# Supplementary material for: Investigation of the oxidative transformation of roxarsone by electrochemistry coupled to hydrophilic interaction liquid chromatography/mass spectrometry
Source: Royal Society of Chemistry journal article supplement (doi:10.1039/c6ja00277c), 2016-12-05
Supplement: c6ja00277c1.pdf [file c6ja00277c1.pdf]

**Investigation of the Oxidative Transformation of Roxarsone  
by Electrochemistry Coupled to Hydrophilic Interaction  
Liquid Chromatography/Mass Spectrometry**

Lisa Maria Frensemeier, Lars Büter, Martin Vogel and Uwe Karst\*

University of Münster, Institute of Inorganic and Analytical Chemistry,  
Corrensstraße 30, 48149 Münster, Germany

**Supporting Information**

Table S-1: Mass spectrometric parameters of the Exactive™ mass spectrometer for the generation of a mass voltammogram, the HILIC separation of the TPs and adduct formation with GSH illustrated in Figure 1 and 3 as well as Figure S-7.

| <b>Parameters</b>           | <b>Mass voltammogram</b> | <b>HILIC separation</b> | <b>GSH adduct formation</b> |
|-----------------------------|--------------------------|-------------------------|-----------------------------|
| mode                        | ESI(-)                   | ESI(-)                  | ESI(-)                      |
| scan range [ <i>m/z</i> ]   | 100-600                  | 100-600                 | 100-600                     |
| resolution                  | high<br>(50,000 @ 2Hz)   | high<br>(50,000 @ 2Hz)  | high<br>(50,000 @ 2Hz)      |
| polarity                    | negativ                  | negativ                 | negativ                     |
| microscans                  | 1                        | 1                       | 1                           |
| lock masses                 | off                      | off                     | off                         |
| AGC* target                 | balanced                 | balanced                | balanced                    |
| maximum injection time [ms] | 100                      | 250                     | 100                         |
| sheath-gas flow rate        | 10.00                    | 60.0                    | 10.0                        |
| aux-gas flow rate           | 0.00                     | 10.0                    | 0.00                        |
| sweep-gas flow rate         | 0.00                     | 0.00                    | 0.00                        |
| spray voltage [kV]          | 4.00                     | 4.00                    | 3.50                        |
| capillary temperature [°C]  | 275                      | 285                     | 275                         |
| capillary voltage [V]       | -32.5                    | -25.0                   | -57.5                       |
| tube-lens voltage [V]       | -80.0                    | -80.0                   | -110                        |
| skimmer voltage [V]         | -22.0                    | -24.0                   | -22.0                       |

\* automatic gain control

Table S-2: Mass spectrometric parameters of the iCAP Qc ICP-MS for the HILIC separation of the TPs in Figure 4.

| Parameter                        | Value                     |
|----------------------------------|---------------------------|
| spray chamber geometry           | cyclonic (quartz)         |
| spray chamber temperature [°C]   | -3                        |
| nebulizer type                   | PFA MicroFlow ST          |
| injector                         | 1 mm                      |
| sampler material                 | Pt                        |
| skimmer material                 | Pt                        |
| power [W]                        | 1550                      |
| cool gas flow rate [mL/min]      | 14.0                      |
| auxiliary gas flow rate [mL/min] | 0.8                       |
| nebulizer gas flow rate [mL/min] | 0.5                       |
| additional gas                   | O <sub>2</sub> (5% (v/v)) |
| extraction lens voltage [V]      | -157.4                    |
| detector voltage [V]             | 1787                      |
| dwel time [s]                    | 0.1 ( <sup>75</sup> As)   |
| collision gas                    | He (4.2 mL/min)           |

Table S-3: LC gradient profile for the separation of a) roxarsone and its TPs and b) the protein adduct formation of oxidized roxarsone with  $\beta$ -lactoglobulin A and human serum albumin. The mobile phases consisted of a) NH<sub>4</sub>FA (solvent A, 50 mM, pH 3.0) and AcN (solvent B) as well as b) 0.1% formic acid in water (solvent A) and AcN (solvent B).

a)

|                |    |    |    |    |    |    |
|----------------|----|----|----|----|----|----|
| <b>t [min]</b> | 5  | 20 | 30 | 35 | 36 | 55 |
| <b>%B</b>      | 85 | 75 | 5  | 5  | 85 | 85 |

b)

|                |    |    |    |    |    |
|----------------|----|----|----|----|----|
| <b>t [min]</b> | 2  | 6  | 9  | 12 | 15 |
| <b>%B</b>      | 25 | 60 | 60 | 25 | 25 |

Table S-4: Mass spectrometric parameters of the micrOToF mass spectrometer for the adduct formation with proteins  $\beta$ -LGA and HSA displayed in Figures 6 and 7.

| <b>Parameter</b>                  | <b>Value</b> |
|-----------------------------------|--------------|
| nebulizer pressure [bar]          | 1.8          |
| dry gas flow rate [L/min]         | 8.0          |
| dry temperature [°C]              | 180          |
| capillary voltage [V]             | 4500.0       |
| endplate offset [V]               | -350.0       |
| capillary exit voltage [V]        | 180.0        |
| skimmer 1 voltage [V]             | 60.0         |
| skimmer 2 voltage [V]             | 22.0         |
| hexapole 1 voltage [V]            | 23.0         |
| hexapole RF voltage [Vpp]         | 700.0        |
| transfer time [ $\mu$ s]          | 50.0         |
| pre-pulse storage time [ $\mu$ s] | 30.0         |
| lens 1 storage voltage [V]        | 40.0         |
| lens 1 extraction voltage [V]     | 21.7         |
| lens 2 voltage [V]                | 9.0          |
| lens 3 voltage [V]                | 22.0         |
| lens 4 voltage [V]                | 1.0          |
| lens 5 voltage [V]                | -35.5        |
| <i>m/z</i> range                  | 50-2500      |

Table S-5: Sum formulae, calculated as well as detected m/z, and relative mass deviations [ppm] of roxarsone and its TPs.

|  |                    | Modification                                   | Sum formula                                                                       | Theoretical m/z                                                               | Detected m/z | Relative deviation [ppm] |     |
|--|--------------------|------------------------------------------------|-----------------------------------------------------------------------------------|-------------------------------------------------------------------------------|--------------|--------------------------|-----|
|  |                    | [M-H] <sup>-</sup>                             | C <sub>6</sub> H <sub>5</sub> O <sub>6</sub> NaS                                  | 261.9338                                                                      | 261.9334     | 1.5                      |     |
|  |                    | [M-H <sub>2</sub> O-H] <sup>-</sup>            | C <sub>6</sub> H <sub>3</sub> O <sub>5</sub> NaS                                  | 243.9233                                                                      | 243.9223     | 4.1                      |     |
|  |                    | [M+Cl] <sup>-</sup>                            | C <sub>6</sub> H <sub>6</sub> O <sub>6</sub> NaSCl                                | 297.9105                                                                      | 297.9105     | 0.0                      |     |
|  | ROX                | [2M-H] <sup>-</sup>                            | C <sub>12</sub> H <sub>11</sub> O <sub>12</sub> N <sub>2</sub> As <sub>2</sub>    | 524.8750                                                                      | 524.8746     | 0.8                      |     |
|  |                    | [2M-H <sub>2</sub> O-H] <sup>-</sup>           | C <sub>12</sub> H <sub>9</sub> O <sub>11</sub> N <sub>2</sub> As <sub>2</sub>     | 506.8644                                                                      | 506.8639     | 1.0                      |     |
|  |                    | [2M+Na-2H] <sup>-</sup>                        | C <sub>12</sub> H <sub>10</sub> O <sub>12</sub> N <sub>2</sub> As <sub>2</sub> Na | 546.8569                                                                      | 546.8567     | 0.4                      |     |
|  |                    | [2M+K-2H] <sup>-</sup>                         | C <sub>12</sub> H <sub>10</sub> O <sub>12</sub> N <sub>2</sub> As <sub>2</sub> K  | 562.8308                                                                      | 562.8302     | 1.1                      |     |
|  | M1.1               | [M+O-H] <sup>-</sup>                           | C <sub>6</sub> H <sub>5</sub> O <sub>7</sub> NaS                                  | 277.9287                                                                      | 277.9286     | 0.4                      |     |
|  | M1.2               | [M+2O-H] <sup>-</sup>                          | C <sub>6</sub> H <sub>5</sub> O <sub>8</sub> NaS                                  | 293.9237                                                                      | 293.9238     | 0.3                      |     |
|  |                    | [M+2O-H <sub>2</sub> O-H] <sup>-</sup>         | C <sub>6</sub> H <sub>3</sub> O <sub>7</sub> NaS                                  | 275.9131                                                                      | 275.9130     | 0.4                      |     |
|  | M1.3               | [M+2O-2H-H] <sup>-</sup>                       | C <sub>6</sub> H <sub>3</sub> O <sub>8</sub> NaS                                  | 291.9080                                                                      | 291.9082     | 0.4                      |     |
|  |                    | [M+2O-2H-H <sub>2</sub> O-H] <sup>-</sup>      | C <sub>6</sub> HO <sub>7</sub> NaS                                                | 273.8974                                                                      | 273.8973     | 0.4                      |     |
|  | M1.4               | [M+3O-H] <sup>-</sup>                          | C <sub>6</sub> H <sub>5</sub> O <sub>9</sub> NaS                                  | 309.9186                                                                      | 309.9187     | 0.3                      |     |
|  |                    | [M+3O-H <sub>2</sub> O-H] <sup>-</sup>         | C <sub>6</sub> H <sub>3</sub> O <sub>8</sub> NaS                                  | 291.9080                                                                      | 291.9082     | 0.4                      |     |
|  | M1.5               | [M+O+NH-H] <sup>-</sup>                        | C <sub>6</sub> H <sub>6</sub> O <sub>7</sub> N <sub>2</sub> As                    | 292.9396                                                                      | 292.9398     | 0.7                      |     |
|  | M1.6               | [M+O+NH-2H-H] <sup>-</sup>                     | C <sub>6</sub> H <sub>4</sub> O <sub>7</sub> N <sub>2</sub> As                    | 290.9240                                                                      | 290.9242     | 0.7                      |     |
|  | M1.7               | [M+2O+NH-2H-H] <sup>-</sup>                    | C <sub>6</sub> H <sub>4</sub> O <sub>8</sub> N <sub>2</sub> As                    | 306.9189                                                                      | 306.9190     | 0.3                      |     |
|  | <sup>i</sup> As    | As(V)                                          | H <sub>2</sub> AsO <sub>4</sub>                                                   | 140.9162                                                                      | 140.9170     | 5.7                      |     |
|  |                    | As(V)-H <sub>2</sub> O                         | AsO <sub>3</sub>                                                                  | 122.9069                                                                      | 122.9063     | 4.9                      |     |
|  |                    | As(V)+FA                                       | CH <sub>4</sub> O <sub>6</sub> As                                                 | 186.9229                                                                      | 186.9228     | 0.5                      |     |
|  | M2.1               | [M+O-HAsO <sub>3</sub> -H] <sup>-</sup>        | C <sub>6</sub> H <sub>4</sub> O <sub>4</sub> N                                    | 154.1046                                                                      | 154.1043     | 1.9                      |     |
|  | M2.2               | [M+2O-HAsO <sub>3</sub> -H] <sup>-</sup>       | C <sub>6</sub> H <sub>4</sub> O <sub>5</sub> N                                    | 170.0095                                                                      | 170.0094     | 0.6                      |     |
|  | M2.3               | [M+2O-2H-HAsO <sub>3</sub> -H] <sup>-</sup>    | C <sub>6</sub> H <sub>2</sub> O <sub>5</sub> N                                    | 167.9938                                                                      | 167.9937     | 0.6                      |     |
|  | M2.4               | [M+3O-HAsO <sub>3</sub> -H] <sup>-</sup>       | C <sub>6</sub> H <sub>4</sub> O <sub>6</sub> N                                    | 186.0044                                                                      | 186.0042     | 1.1                      |     |
|  | M2.5               | [M+2O+NH-2H-HAsO <sub>3</sub> -H] <sup>-</sup> | C <sub>6</sub> H <sub>3</sub> O <sub>5</sub> N <sub>2</sub>                       | 183.0047                                                                      | 183.0046     | 0.6                      |     |
|  | M2.6               | [M+3O+NH-HAsO <sub>3</sub> -H] <sup>-</sup>    | C <sub>6</sub> H <sub>5</sub> O <sub>6</sub> N <sub>2</sub>                       | 201.0153                                                                      | 201.0151     | 1.0                      |     |
|  | M2.7               | [M+3O-2H+NH-HAsO <sub>3</sub> -H] <sup>-</sup> | C <sub>6</sub> H <sub>3</sub> O <sub>6</sub> N <sub>2</sub>                       | 198.9997                                                                      | 198.9994     | 1.5                      |     |
|  | M <sub>red</sub> 1 | [M-2O+2H-H] <sup>-</sup>                       | C <sub>6</sub> H <sub>7</sub> O <sub>4</sub> NaS                                  | 231.9597                                                                      | 231.9588     | 3.9                      |     |
|  |                    | [M-2O+2H-H <sub>2</sub> O-H] <sup>-</sup>      | C <sub>6</sub> H <sub>5</sub> O <sub>3</sub> NaS                                  | 213.9487                                                                      | 213.9487     | 0.0                      |     |
|  | M <sub>red</sub> 2 | [M+NH-2O+2H-H] <sup>-</sup>                    | C <sub>6</sub> H <sub>8</sub> O <sub>4</sub> N <sub>2</sub> As                    | 246.9706                                                                      | 246.9694     | 4.9                      |     |
|  | M <sub>red</sub> 3 | [M+O-2H-2O+2H-H] <sup>-</sup>                  | C <sub>6</sub> H <sub>5</sub> O <sub>5</sub> NaS                                  | 245.9389                                                                      | 245.9378     | 4.5                      |     |
|  | Dimer              | dimer 1                                        | [2M-2H-H] <sup>-</sup>                                                            | C <sub>12</sub> H <sub>9</sub> O <sub>12</sub> N <sub>2</sub> As <sub>2</sub> | 522.8593     | 522.8591                 | 0.4 |
|  |                    | dimer 2                                        | [2M+2O+NH-4H-HAsO <sub>3</sub> -H] <sup>-</sup>                                   | C <sub>12</sub> H <sub>7</sub> O <sub>11</sub> N <sub>3</sub> As              | 443.9302     | 443.9301                 | 0.2 |
|  | U                  | U1                                             | unknown                                                                           | n. d.                                                                         | 157.9729     | -                        |     |
|  |                    | U2                                             | unknown                                                                           | n. d.                                                                         | 208.9044     | -                        |     |
|  |                    | U3                                             | unknown                                                                           | n. d.                                                                         | 224.8782     | -                        |     |
|  |                    | U4                                             | unknown                                                                           | C <sub>6</sub> H <sub>3</sub> O <sub>7</sub> N <sub>3</sub>                   | 227.9887     | 227.9893                 | 2.6 |
|  |                    | U5                                             | unknown                                                                           | C <sub>8</sub> H <sub>2</sub> O <sub>5</sub> N <sub>2</sub> As                | 279.9096     | 279.9080                 | 5.7 |

n. d. = not determined

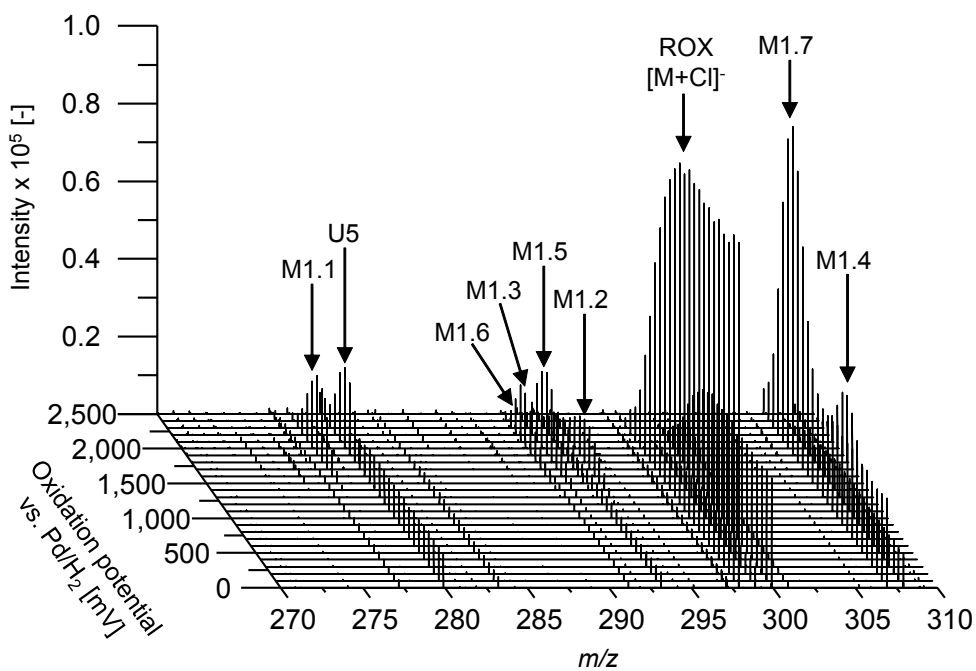

Figure S-1: Mass voltammogram ( $m/z$  270-310) of roxarsone obtained with ESI(-)-MS in the potential range 0-2,500 mV vs. Pd/H<sub>2</sub>. The section shows formation of M1 products and U5.

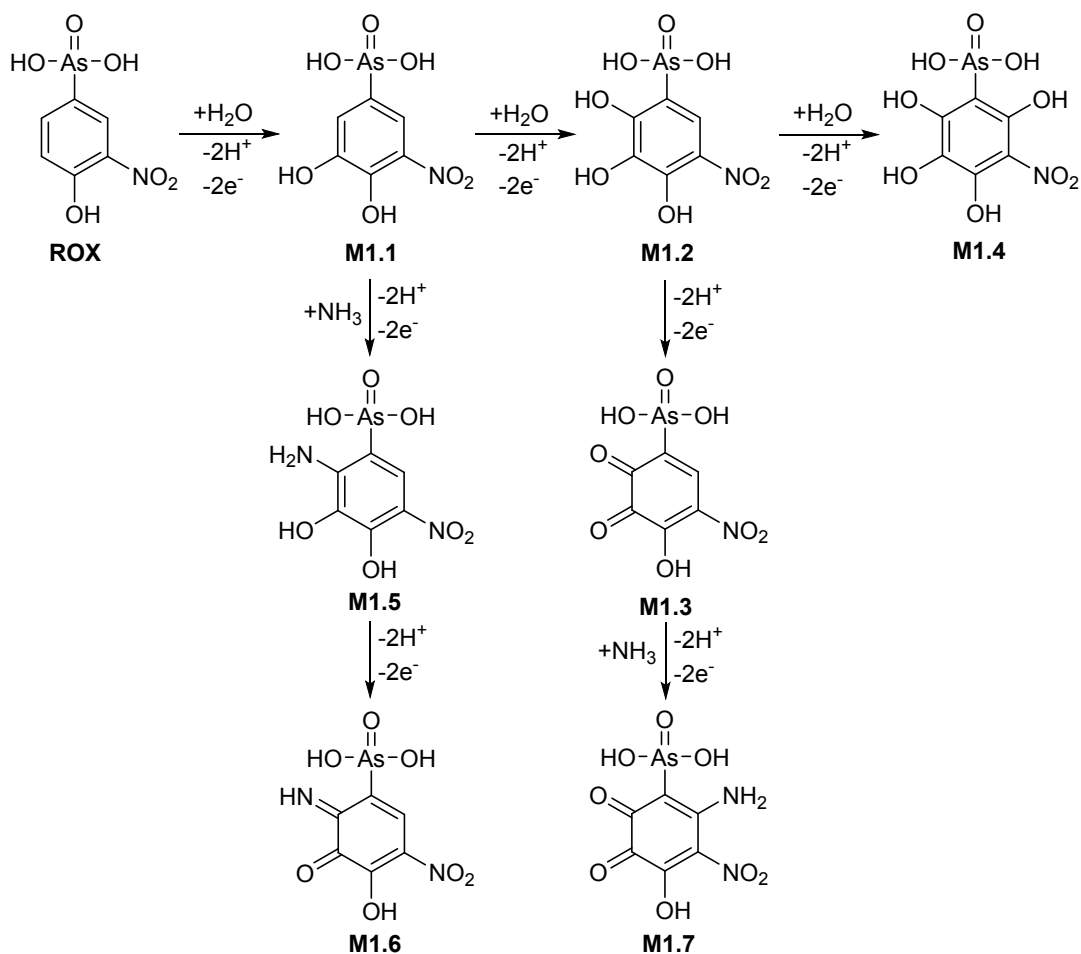

Figure S-2: Structure proposals and reaction pathway of type M1 oxidation products of roxarsone.

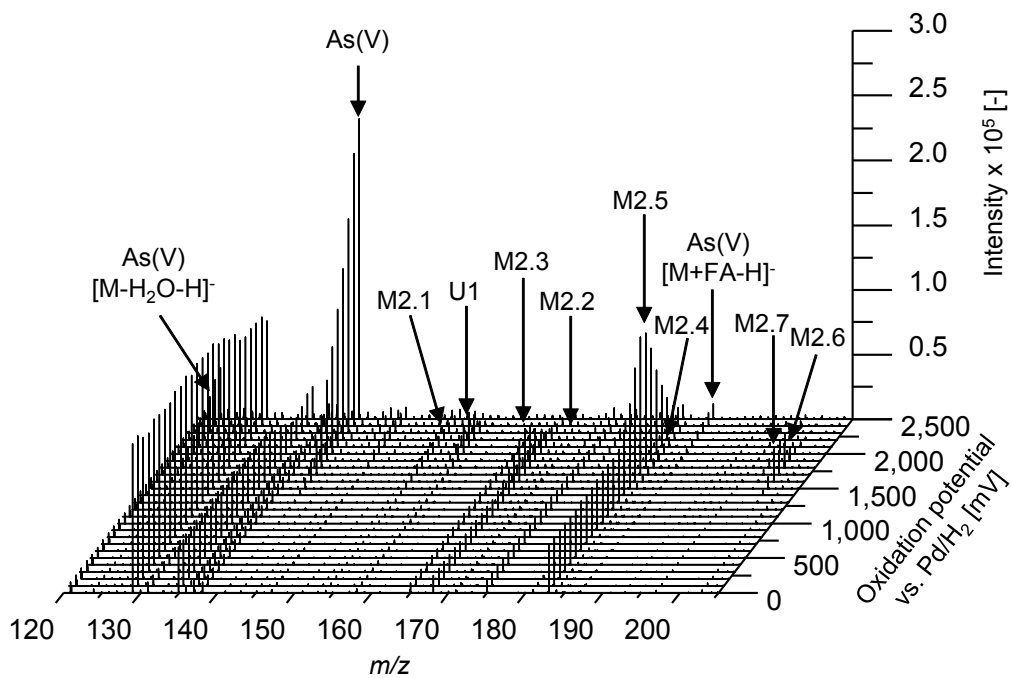

Figure S-3

Figure S-3: Mass voltammogram ( $m/z$  120-205) of roxarsone obtained by ESI(-)-MS in the potential range 0-2,500 mV vs. Pd/H<sub>2</sub>. The section shows formation of M2 products, As(V) and U1.

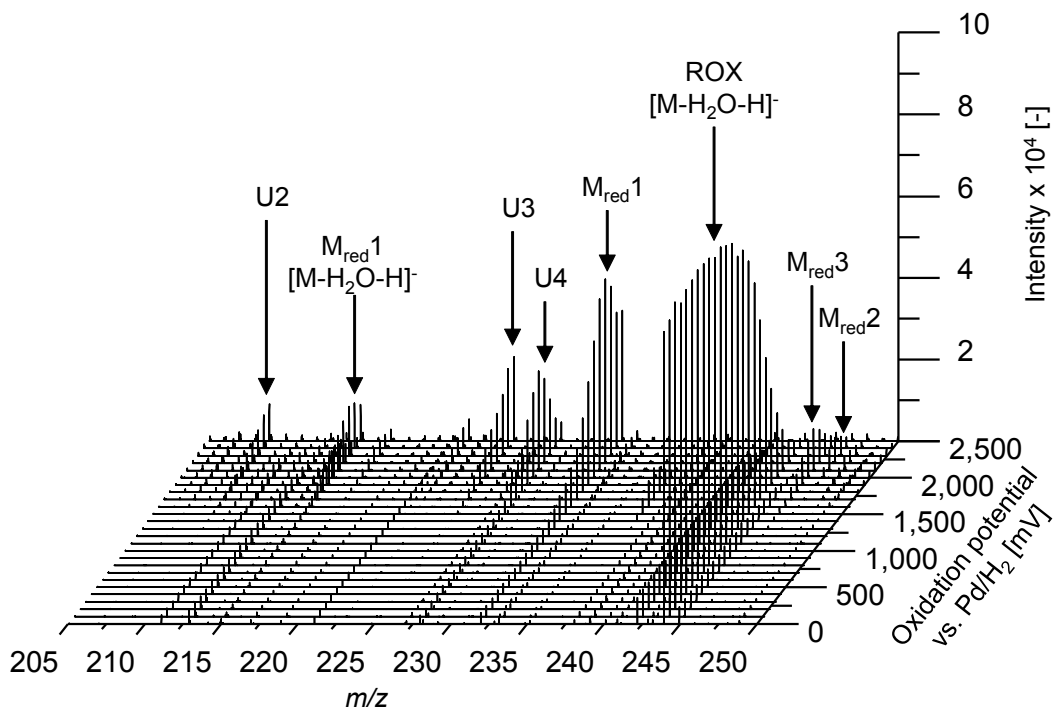

Figure S-4: Mass voltammogram ( $m/z$  205-250) of roxarsone obtained by ESI(-)-MS in the potential range 0-2,500 mV vs. Pd/H<sub>2</sub>. The section shows formation of M<sub>red</sub> products, U2, U3 and U4.

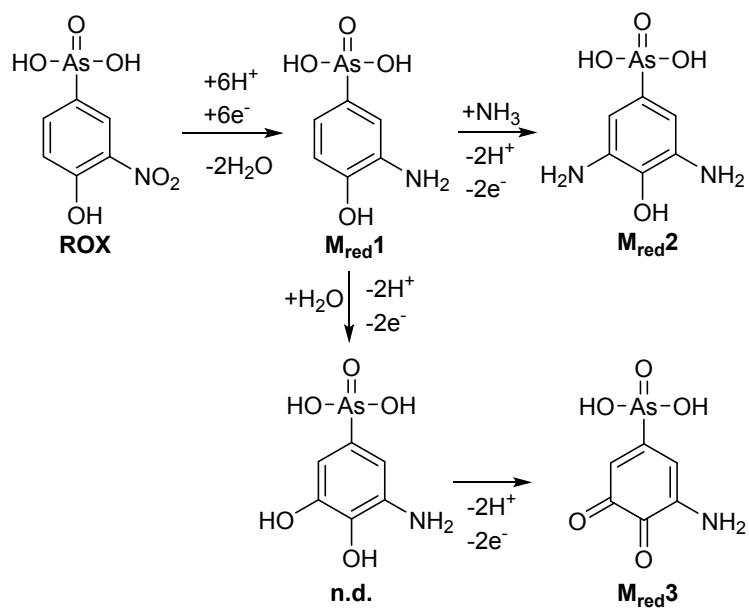

Figure S-5: Structure proposals and reaction pathway  $M_{red}$  formation.

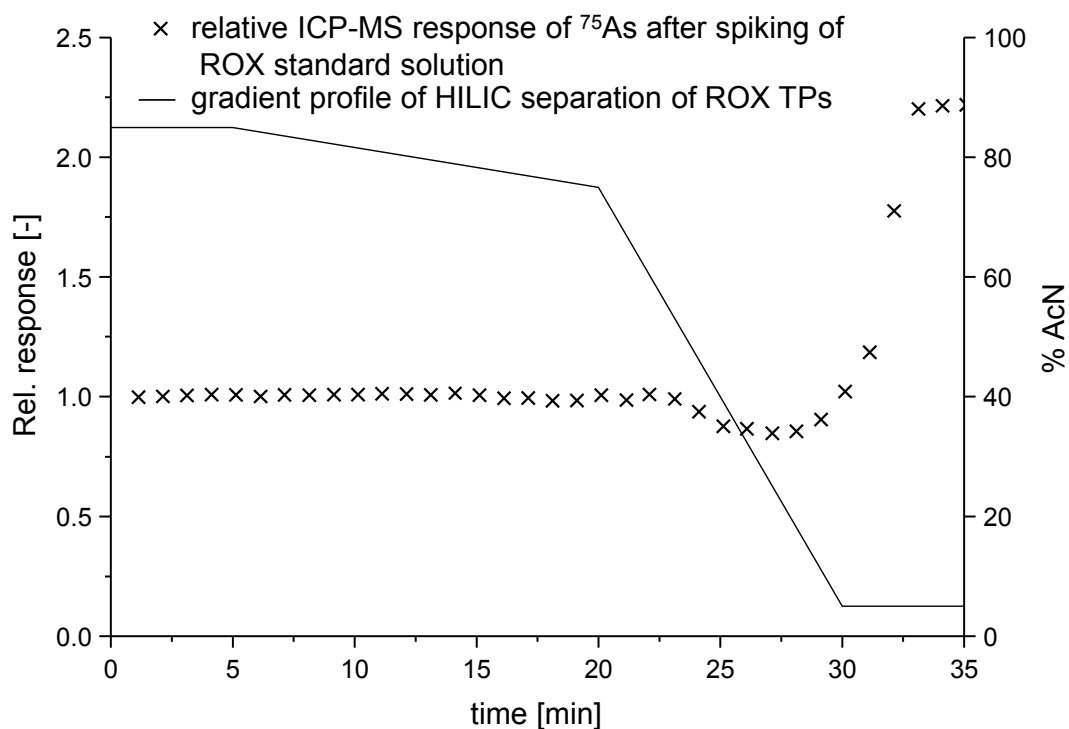

Figure S-6: Response function of the ICP-MS (iCap Qc) for the used gradient during HILIC separation of roxarsone and its TPs.



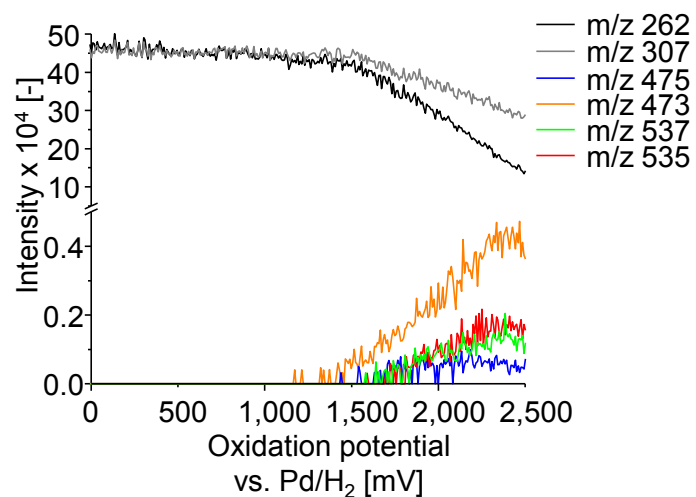

Figure S-7: Adduct formation of ROX with GSH. Depicted are the extracted ion chromatograms of ROX (m/z 262), GSH (m/z 306) and adducts GSH+168 (m/z 475) and GSH+230 (m/z 537) as well as their dehydrogenation products GSH+166 (m/z 473) and GSH+228 (m/z 535).

Table S-6: Sum formulae and calculated as well as detected m/z of roxarsone, GSH and detected adducts presented in Figure 8.

| Modification | Sum formula                                                        | Calculated m/z | Detected m/z | Relative deviation [ppm] |
|--------------|--------------------------------------------------------------------|----------------|--------------|--------------------------|
| ROX          | C <sub>6</sub> H <sub>5</sub> O <sub>6</sub> NA <sub>s</sub>       | 261.9338       | 261.9333     | 1.9                      |
| GSH          | C <sub>10</sub> H <sub>16</sub> O <sub>6</sub> N <sub>3</sub> S    | 306.0754       | 306.0765     | 3.6                      |
| GSH+168      | C <sub>16</sub> H <sub>19</sub> O <sub>11</sub> N <sub>4</sub> S   | 475.0766       | 475.0778     | 2.5                      |
| GSH+166      | C <sub>16</sub> H <sub>17</sub> O <sub>11</sub> N <sub>4</sub> S   | 473.0609       | 473.0620     | 2.3                      |
| GSH+230      | C <sub>16</sub> H <sub>22</sub> O <sub>10</sub> N <sub>4</sub> AsS | 537.0267       | 537.0282     | 2.8                      |
| GSH+228      | C <sub>16</sub> H <sub>20</sub> O <sub>10</sub> N <sub>4</sub> AsS | 535.0111       | 535.0124     | 2.4                      |
